# Supplementary material for: Morphometric Study of the Initial Ventricular Indices to Predict the Complications and Outcome of Aneurysmal Subarachnoid Hemorrhage
Source: MDPI journal article supplement (doi:10.3390/jcm12072585), 2023-03-29
Supplement: s1 [file s1]

## SUPPLEMENTARY MATERIALS

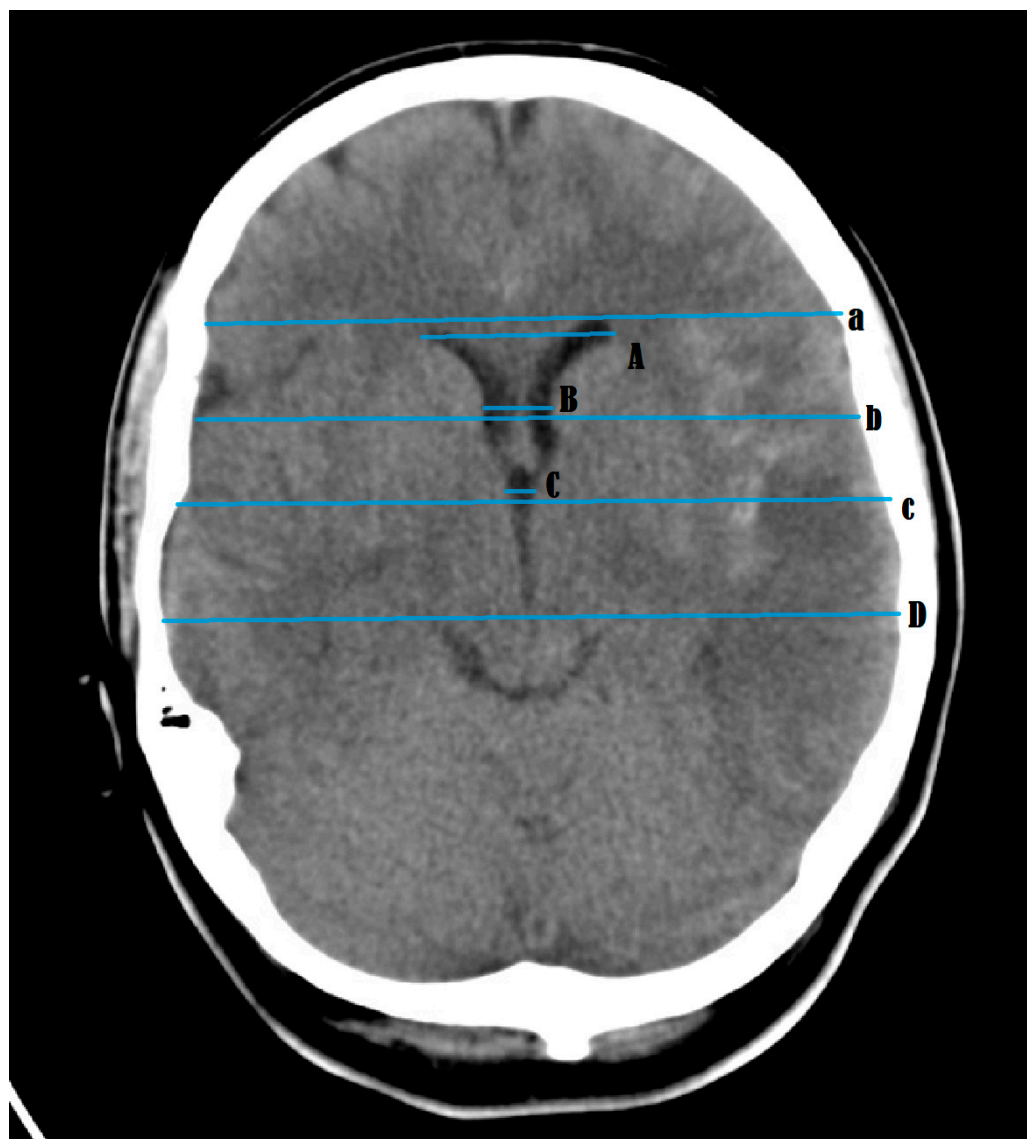

**Figure S1.** Illustration of the ventricular measurements. **Bifrontal ratio:** maximum width between the two frontal horns (A)/internal width of the vault at same level (a). **Bicaudate ratio:** minimum width of the ventricles between caudate nuclei (B)/internal width of the vault at same level (b). **Ventricular ratio:** minimum width of the ventricles (B)/maximum width between frontal horns (A). **Third ventricle ratio:** greatest width of the third ventricle (C)/internal width of the vault at same level (c). **Evans' index:** maximum width between frontal horns (A)/maximum internal width of the vault (D). **Huckman's index:** maximum width between the two frontal horns (A) + minimum width of the ventricles between caudate nuclei (B).

**Table S1.** Exploratory analyses based on the bivariate associations between the ventricular indices (as continuous variables) and other parameters included in this study.

| Parameter                                                                                                                                                                                                                                                                                                                                                                                                             |         | Stats | Bifrontal ratio   | Bicaudate ratio   | Evans' index      | Ventricular ratio | Huckmans' index   | 3 <sup>rd</sup> ventricle ratio |
|-----------------------------------------------------------------------------------------------------------------------------------------------------------------------------------------------------------------------------------------------------------------------------------------------------------------------------------------------------------------------------------------------------------------------|---------|-------|-------------------|-------------------|-------------------|-------------------|-------------------|---------------------------------|
|  <p><b>Copyright:</b> © 2023 by the authors. Licensee MDPI, Basel, Switzerland. This article is an open access article distributed under the terms and conditions of the Creative Commons Attribution (CC BY) license (<a href="https://creativecommons.org/licenses/by/4.0/">https://creativecommons.org/licenses/by/4.0/</a>).</p> |         |       |                   |                   |                   |                   |                   |                                 |
| Age, per year increase                                                                                                                                                                                                                                                                                                                                                                                                | CC      |       | 0.275             | 0.370             | 0.203             | 0.358             | 0.318             | 0.375                           |
|                                                                                                                                                                                                                                                                                                                                                                                                                       | P-value |       | <b>&lt;0.0001</b> | <b>&lt;0.0001</b> | <b>&lt;0.0001</b> | <b>&lt;0.0001</b> | <b>&lt;0.0001</b> | <b>&lt;0.0001</b>               |
| Female sex                                                                                                                                                                                                                                                                                                                                                                                                            | CC      |       | −0.048            | −0.052            | −0.082            | −0.061            | −0.158            | −0.050                          |
|                                                                                                                                                                                                                                                                                                                                                                                                                       | P-value |       | 0.200             | 0.163             | <b>0.027</b>      | <b>0.100</b>      | <b>&lt;0.0001</b> | 0.181                           |
| WFNS grade 4–5                                                                                                                                                                                                                                                                                                                                                                                                        | CC      |       | 0.124             | 0.116             | 0.072             | 0.100             | 0.085             | 0.133                           |
|                                                                                                                                                                                                                                                                                                                                                                                                                       | P-value |       | <b>0.001</b>      | <b>0.002</b>      | 0.053             | <b>0.007</b>      | <b>0.021</b>      | <b>&lt;0.0001</b>               |
| Fisher grade 3–4                                                                                                                                                                                                                                                                                                                                                                                                      | CC      |       | 0.193             | 0.184             | 0.144             | 0.138             | 0.150             | 0.182                           |
|                                                                                                                                                                                                                                                                                                                                                                                                                       | P-value |       | <b>&lt;0.0001</b> | <b>&lt;0.0001</b> | <b>&lt;0.0001</b> | <b>&lt;0.0001</b> | <b>&lt;0.0001</b> | <b>&lt;0.0001</b>               |
| Clipping                                                                                                                                                                                                                                                                                                                                                                                                              | CC      |       | −0.213            | −0.267            | −0.227            | −0.245            | −0.262            | −0.207                          |
|                                                                                                                                                                                                                                                                                                                                                                                                                       | P-value |       | <b>&lt;0.0001</b> | <b>&lt;0.0001</b> | <b>&lt;0.0001</b> | <b>&lt;0.0001</b> | <b>&lt;0.0001</b> | <b>&lt;0.0001</b>               |
| Increased leukocyte count at admission                                                                                                                                                                                                                                                                                                                                                                                | CC      |       | 0.006             | −0.017            | 0.007             | −0.005            | −0.007            | −0.027                          |
|                                                                                                                                                                                                                                                                                                                                                                                                                       | P-value |       | 0.882             | 0.680             | 0.863             | 0.898             | 0.870             | 0.520                           |
| Increased CRP at admission                                                                                                                                                                                                                                                                                                                                                                                            | CC      |       | 0.098             | 0.135             | 0.102             | 0.126             | 0.143             | 0.182                           |
|                                                                                                                                                                                                                                                                                                                                                                                                                       | P-value |       | <b>0.019</b>      | <b>0.001</b>      | <b>0.014</b>      | <b>0.002</b>      | <b>&lt;0.0001</b> | <b>&lt;0.0001</b>               |
| Increased IL-6 in CSF at admission                                                                                                                                                                                                                                                                                                                                                                                    | CC      |       | 0.078             | 0.089             | 0.083             | 0.051             | 0.096             | 0.072                           |
|                                                                                                                                                                                                                                                                                                                                                                                                                       | P-value |       | 0.148             | 0.096             | 0.120             | 0.342             | 0.069             | 0.179                           |
| Increased body temperature at admission                                                                                                                                                                                                                                                                                                                                                                               | CC      |       | −0.045            | −0.059            | −0.063            | −0.040            | −0.048            | −0.056                          |
|                                                                                                                                                                                                                                                                                                                                                                                                                       | P-value |       | 0.256             | 0.140             | 0.108             | 0.305             | 0.223             | 0.158                           |
| SEBES 3–4                                                                                                                                                                                                                                                                                                                                                                                                             | CC      |       | −0.163            | −0.234            | −0.178            | −0.214            | −0.245            | −0.265                          |
|                                                                                                                                                                                                                                                                                                                                                                                                                       | P-value |       | <b>&lt;0.0001</b> | <b>&lt;0.0001</b> | <b>&lt;0.0001</b> | <b>&lt;0.0001</b> | <b>&lt;0.0001</b> | <b>&lt;0.0001</b>               |
| Decompressive craniectomy                                                                                                                                                                                                                                                                                                                                                                                             | CC      |       | −0.184            | −0.265            | −0.195            | −0.265            | −0.259            | −0.259                          |
|                                                                                                                                                                                                                                                                                                                                                                                                                       | P-value |       | <b>&lt;0.0001</b> | <b>&lt;0.0001</b> | <b>&lt;0.0001</b> | <b>&lt;0.0001</b> | <b>&lt;0.0001</b> | <b>&lt;0.0001</b>               |
| Occurrence of ICP increase                                                                                                                                                                                                                                                                                                                                                                                            | CC      |       | −0.062            | −0.114            | −0.070            | −0.114            | −0.106            | −0.161                          |
|                                                                                                                                                                                                                                                                                                                                                                                                                       | P-value |       | 0.103             | <b>0.002</b>      | 0.059             | <b>0.002</b>      | <b>0.004</b>      | <b>&lt;0.0001</b>               |
| Duration of ICP increase                                                                                                                                                                                                                                                                                                                                                                                              | CC      |       | −0.075            | −0.126            | −0.083            | −0.135            | −0.119            | −0.180                          |
|                                                                                                                                                                                                                                                                                                                                                                                                                       | P-value |       | 0.056             | <b>0.001</b>      | <b>0.033</b>      | <b>&lt;0.0001</b> | <b>0.002</b>      | <b>&lt;0.0001</b>               |
| Aneurysm rebleeding                                                                                                                                                                                                                                                                                                                                                                                                   | CC      |       | 0.019             | 0.049             | 0.003             | 0.054             | 0.033             | 0.037                           |
|                                                                                                                                                                                                                                                                                                                                                                                                                       | P-value |       | 0.607             | 0.196             | 0.928             | 0.143             | 0.376             | 0.325                           |
| DIND                                                                                                                                                                                                                                                                                                                                                                                                                  | CC      |       | −0.015            | 0.055             | 0.005             | 0.063             | 0.027             | 0.063                           |
|                                                                                                                                                                                                                                                                                                                                                                                                                       | P-value |       | 0.721             | 0.181             | 0.896             | 0.121             | 0.508             | 0.125                           |
| TCD vasospasm                                                                                                                                                                                                                                                                                                                                                                                                         | CC      |       | −0.102            | −0.108            | −0.070            | −0.095            | −0.112            | −0.099                          |
|                                                                                                                                                                                                                                                                                                                                                                                                                       | P-value |       | <b>0.012</b>      | <b>0.008</b>      | <b>0.079</b>      | <b>0.017</b>      | <b>0.005</b>      | <b>0.014</b>                    |
| Angiographically treated vasospasm                                                                                                                                                                                                                                                                                                                                                                                    | CC      |       | −0.021            | −0.008            | −0.010            | 0.014             | −0.027            | −0.004                          |
|                                                                                                                                                                                                                                                                                                                                                                                                                       | P-value |       | 0.578             | 0.827             | 0.795             | 0.715             | 0.462             | 0.915                           |
| Early angiographic vasospasm (<72h after ictus)                                                                                                                                                                                                                                                                                                                                                                       | CC      |       | −0.088            | 0.064             | 0.093             | 0.016             | 0.071             | 0.002                           |
|                                                                                                                                                                                                                                                                                                                                                                                                                       | P-value |       | <b>0.038</b>      | 0.131             | <b>0.026</b>      | 0.695             | 0.086             | 0.960                           |
| Increased duration of mechanical ventilation                                                                                                                                                                                                                                                                                                                                                                          | CC      |       | 0.050             | 0.075             | 0.029             | 0.064             | 0.041             | 0.061                           |
|                                                                                                                                                                                                                                                                                                                                                                                                                       | P-value |       | 0.189             | <b>0.049</b>      | 0.436             | 0.087             | 0.277             | 0.107                           |
| Increased mean 14-days CRP during SAH                                                                                                                                                                                                                                                                                                                                                                                 | CC      |       | 0.027             | 0.039             | 0.008             | 0.042             | 0.016             | 0.079                           |
|                                                                                                                                                                                                                                                                                                                                                                                                                       | P-value |       | 0.518             | 0.352             | 0.850             | 0.310             | 0.695             | 0.060                           |
| Increased mean 14-days leukocyte count during SAH                                                                                                                                                                                                                                                                                                                                                                     | CC      |       | 0.041             | 0.030             | 0.023             | 0.014             | 0.003             | 0.027                           |
|                                                                                                                                                                                                                                                                                                                                                                                                                       | P-value |       | 0.321             | 0.477             | 0.577             | 0.737             | 0.941             | 0.523                           |
| Increased mean 14-days IL-6 in CSF                                                                                                                                                                                                                                                                                                                                                                                    | CC      |       | 0.187             | 0.258             | 0.194             | 0.226             | 0.254             | 0.193                           |
|                                                                                                                                                                                                                                                                                                                                                                                                                       | P-value |       | <b>&lt;0.0001</b> | <b>&lt;0.0001</b> | <b>&lt;0.0001</b> | <b>&lt;0.0001</b> | <b>&lt;0.0001</b> | <b>&lt;0.0001</b>               |
| Fever duration, per day increase                                                                                                                                                                                                                                                                                                                                                                                      | CC      |       | 0.101             | 0.126             | 0.087             | 0.103             | 0.106             | 0.087                           |
|                                                                                                                                                                                                                                                                                                                                                                                                                       | P-value |       | <b>0.010</b>      | <b>0.001</b>      | <b>0.025</b>      | <b>0.007</b>      | <b>0.006</b>      | <b>0.025</b>                    |
| Systemic infection                                                                                                                                                                                                                                                                                                                                                                                                    | CC      |       | 0.070             | 0.068             | 0.044             | 0.041             | 0.042             | 0.011                           |

|                                          |         |                   |                   |              |                   |                   |                   |
|------------------------------------------|---------|-------------------|-------------------|--------------|-------------------|-------------------|-------------------|
|                                          | P-value | 0.077             | 0.084             | 0.259        | 0.299             | 0.284             | 0.778             |
| Acute coronary syndrome                  | CC      | 0.081             | 0.079             | 0.056        | 0.052             | 0.061             | 0.070             |
|                                          | P-value | <b>0.045</b>      | 0.051             | 0.158        | 0.192             | 0.127             | 0.081             |
| Acute renal failure                      | CC      | 0.093             | 0.106             | 0.060        | 0.091             | 0.077             | 0.088             |
|                                          | P-value | <b>0.021</b>      | <b>0.009</b>      | 0.134        | <b>0.022</b>      | 0.054             | <b>0.028</b>      |
| Epilepsy                                 | CC      | −0.046            | −0.070            | −0.033       | −0.063            | −0.054            | −0.047            |
|                                          | P-value | 0.221             | 0.061             | 0.372        | 0.089             | 0.144             | 0.209             |
| Cerebral infarction                      | CC      | 0.068             | 0.109             | 0.060        | 0.119             | 0.074             | 0.101             |
|                                          | P-value | 0.072             | <b>0.004</b>      | 0.105        | <b>0.001</b>      | 0.046             | <b>0.007</b>      |
| In-hospital mortality                    | CC      | 0.099             | 0.113             | 0.067        | 0.114             | 0.088             | 0.113             |
|                                          | P-value | <b>0.008</b>      | <b>0.003</b>      | <b>0.069</b> | <b>0.002</b>      | <b>0.017</b>      | <b>0.002</b>      |
| Unfavorable outcome at 6 months (mRs >3) | CC      | 0.163             | 0.190             | 0.123        | 0.175             | 0.160             | 0.179             |
|                                          | P-value | <b>&lt;0.0001</b> | <b>&lt;0.0001</b> | <b>0.001</b> | <b>&lt;0.0001</b> | <b>&lt;0.0001</b> | <b>&lt;0.0001</b> |

**Abbreviations:** CC – correlation coefficient, DIND= delayed ischemic neurological deficit, SEBES= Subarachnoid Early Brain Edema Score, CRP= C-reactive protein, IL-6= interleukin-6, ICP= intracranial pressure, TCD= transcranial Doppler sonography, CSF= cerebrospinal fluid, WFNS= World Federation of Neurosurgical Societies, mRs= modified Rankin scale. Significant findings are in **bold**.

**Table S2.** ROC analysis for the association between the ventricular measurements and primary study endpoint (unfavorable outcome at 6 months after SAH defined as modified Rankin scale >3). Based on the AUC values a clinically relevant cut-off was determined for the ventricular ratios and indices.

| Ventricular measurements/indices  | AUC (95 % CI)       | p-value           | Selected cut-off |
|-----------------------------------|---------------------|-------------------|------------------|
| <b>Bifrontal ratio: A/a</b>       | 0.603 (0.559–0.648) | <b>&lt;0.0001</b> | 0.337            |
| <b>Bicaudate ratio: B/b</b>       | 0.624 (0.579–0.669) | <b>&lt;0.0001</b> | 0.175            |
| <b>Ventricular ratio: B/A</b>     | 0.614 (0.569–0.660) | <b>&lt;0.0001</b> | 0.559            |
| <b>Huckman's index: A+B</b>       | 0.618 (0.573–0.663) | <b>&lt;0.0001</b> | 5.480            |
| <b>Evans' index: A/D</b>          | 0.590 (0.544–0.635) | <b>&lt;0.0001</b> | 0.281            |
| <b>Third ventricle ratio: C/c</b> | 0.613 (0.568–0.658) | <b>&lt;0.0001</b> | 0.053            |

**Abbreviations:** ROC= receiver operating characteristics, AUC= area under the curve, CI= confidence interval, A= maximum width between the two frontal horns, a= internal width of the vault at level of A, B= minimum width of the ventricles between caudate nuclei, b= internal width of the vault at level of B, C= greatest width of the third ventricle, c= internal width of the vault at level of C, D= maximum internal width of the vault. Significant values are in **bold**.

**Table S3.** Univariate analysis of the ventricular indices and other categorical variables. Ventricular indices are dichotomized at clinically relevant cut-off values, according to the AUC of the ROC curves. All major endpoint, as well as older age, clipping, severe SEBES, IVH, DC and infectious parameters are significantly correlated to higher ventricular indices.

|                                | Bifrontal ratio ≥ 0.337 |         | Bicaudate ratio ≥ 0.175 |         | Evans' index ≥ 0.281 |         | Ventricular ratio ≥ 0.559 |         | Huckman's index ≥ 5.48 |         | 3rd ventricle ratio ≥ 0.053 |         |
|--------------------------------|-------------------------|---------|-------------------------|---------|----------------------|---------|---------------------------|---------|------------------------|---------|-----------------------------|---------|
|                                | OR (95% CI)             | p-value | OR (95% CI)             | p-value | OR (95% CI)          | p-value | OR (95% CI)               | p-value | OR (95% CI)            | p-value | OR (95% CI)                 | p-value |
| <b>Patient characteristics</b> |                         |         |                         |         |                      |         |                           |         |                        |         |                             |         |
| Age>55 years                   | 2.79 (2.05–3.79)        | <0.0001 | 3.49 (2.55–4.78)        | <0.0001 | 2.09 (1.55–2.82)     | <0.0001 | 3.45 (2.50–4.75)          | <0.0001 | 3.32 (2.45–4.51)       | <0.0001 | 3.14 (2.30–4.28)            | <0.0001 |
| Female sex                     | 0.87 (0.64–1.19)        | 0.425   | 0.83 (0.61–1.15)        | 0.289   | 0.74 (0.55–1.02)     | 0.068   | 0.75 (0.54–1.03)          | 0.082   | 0.51 (0.38–0.70)       | <0.0001 | 0.75 (0.55–1.03)            | 0.080   |
| <b>SAH characteristics</b>     |                         |         |                         |         |                      |         |                           |         |                        |         |                             |         |
| WFNS 4–5                       | 1.35 (1.01–1.82)        | 0.05    | 1.84 (1.36–2.49)        | <0.001  | 1.22 (0.91–1.64)     | 0.202   | 1.74 (1.28–2.37)          | <0.001  | 1.45 (1.08–1.93)       | 0.014   | 1.43 (1.06–1.92)            | 0.02    |
| Fisher 3–4                     | 2.48 (1.46–4.20)        | <0.001  | 2.72 (1.50–4.92)        | <0.001  | 2.02 (1.18–3.47)     | 0.011   | 1.98 (1.11–3.54)          | 0.024   | 2.19 (1.28–3.74)       | 0.004   | 2.70 (1.60–4.56)            | <0.001  |
| SEBES 3–4                      | 0.55 (0.41–0.74)        | <0.0001 | 0.48 (0.35–0.65)        | <0.0001 | 0.55 (0.41–0.74)     | <0.0001 | 0.57 (0.42–0.78)          | <0.0001 | 0.44 (0.33–0.60)       | <0.0001 | 0.50 (0.37–0.63)            | <0.0001 |
| IVH                            | 4.22 (3.08–5.78)        | <0.0001 | 4.44 (3.19–6.16)        | <0.0001 | 4.36 (3.17–5.99)     | <0.0001 | 3.33 (2.40–4.63)          | <0.0001 | 4.85 (3.54–6.65)       | <0.0001 | 4.80 (3.49–6.58)            | <0.0001 |
| Clipping                       | 0.49 (0.36–0.67)        | <0.0001 | 0.40 (0.28–0.55)        | <0.0001 | 0.51 (0.38–0.70)     | <0.0001 | 0.52 (0.37–0.73)          | <0.0001 | 0.42 (0.31–0.57)       | <0.0001 | 0.52 (0.38–0.70)            | <0.0001 |
| <b>SAH complications</b>       |                         |         |                         |         |                      |         |                           |         |                        |         |                             |         |
| Aneurysm rebleeding            | 0.98 (0.54–1.78)        | 1.000   | 1.71 (0.94–3.11)        | 0.087   | 0.96 (0.53–1.73)     | 1.000   | 1.89 (1.04–3.42)          | 0.039   | 1.08 (0.60–1.94)       | 0.881   | 0.99 (0.55–1.80)            | 1.000   |
| DC                             | 0.49 (0.35–0.69)        | <0.0001 | 0.39 (0.27–0.56)        | <0.0001 | 0.53 (0.38–0.74)     | <0.0001 | 0.36 (0.24–0.52)          | <0.0001 | 0.39 (0.28–0.55)       | <0.0001 | 0.42 (0.30–0.58)            | <0.0001 |
| Pathologic ICPs ≥1 day         | 0.81 (0.60–1.09)        | 0.174   | 0.83 (0.61–1.12)        | 0.219   | 0.81 (0.61–1.09)     | 0.176   | 0.84 (0.62–1.15)          | 0.307   | 0.66 (0.49–0.88)       | 0.006   | 0.64 (0.47–0.86)            | 0.003   |
| DIND                           | 1.15 (0.81–1.63)        | 0.475   | 1.30 (0.92–1.86)        | 0.146   | 1.06 (0.75–1.50)     | 0.790   | 1.34 (0.94–1.92)          | 0.116   | 1.06 (0.75–1.50)       | 0.792   | 1.39 (0.98–1.98)            | 0.075   |

|                                  |                         |                   |                           |                   |                         |                   |                         |                   |                         |                   |                         |                   |
|----------------------------------|-------------------------|-------------------|---------------------------|-------------------|-------------------------|-------------------|-------------------------|-------------------|-------------------------|-------------------|-------------------------|-------------------|
| TCD vasospasms                   | <b>0.71 (0.51–0.97)</b> | <b>0.035</b>      | <b>0.61 (0.44–0.85)</b>   | <b>0.004</b>      | 0.82 (0.59–1.12)        | 0.225             | <b>0.71 (0.51–0.99)</b> | <b>0.050</b>      | <b>0.67 (0.49–0.91)</b> | <b>0.013</b>      | 0.76 (0.55–1.04)        | 0.090             |
| Endovascular vasospasm treatment | 1.02 (0.72–1.45)        | 0.929             | 1.03 (0.72–1.47)          | 0.928             | 1.10 (0.77–1.55)        | 0.657             | 1.26 (0.88–1.79)        | 0.230             | 0.90 (0.64–1.27)        | 0.599             | 1.08 (0.76–1.53)        | 0.723             |
| Early angiographic vasospasm #   | 1.76 (0.98–3.17)        | 0.063             | 1.48 (0.84–2.59)          | 0.192             | 1.50 (0.85–2.60)        | 0.198             | 1.19 (0.67–2.11)        | 0.554             | 1.49 (0.86–2.58)        | 0.165             | 0.87 (0.50–1.50)        | 0.672             |
| Epileptic seizures               | 0.80 (0.48–1.33)        | 0.439             | 0.68 (0.40–1.17)          | 0.187             | 0.75 (0.44–1.27)        | 0.299             | 0.59 (0.33–1.06)        | 0.077             | −0.74 (0.44–1.24)       | 0.301             | 0.71 (0.42–1.17)        | 0.196             |
| <b>Other complications</b>       |                         |                   |                           |                   |                         |                   |                         |                   |                         |                   |                         |                   |
| Mechanical ventilation ≥7 days   | 1.07 (0.79–1.44)        | 0.703             | 1.24 (0.92–1.69)          | 0.164             | 1.03 (0.77–1.39)        | 0.880             | 1.12 (0.82–1.53)        | 0.479             | 1.08 (0.80–1.45)        | 0.653             | 1.15 (0.85–1.54)        | 0.404             |
| Fever duration, ≥5 days          | <b>1.39 (1.02–1.88)</b> | <b>0.042</b>      | <b>1.44 (1.05–1.97)</b>   | <b>0.025</b>      | <b>1.42 (1.05–1.93)</b> | <b>0.029</b>      | 1.20 (0.87–1.65)        | 0.291             | 1.36 (1.00–1.84)        | 0.054             | 1.30 (0.96–1.77)        | 0.102             |
| Systemic infections              | 1.26 (0.92–1.73)        | 0.152             | <b>1.40 (1.02–1.92)</b>   | <b>0.043</b>      | 1.23 (0.91–1.69)        | 0.179             | 1.27 (0.92–1.75)        | 0.162             | 1.18 (0.87–1.60)        | 0.310             | 1.02 (0.75–1.39)        | 0.937             |
| Sepsis                           | 1.39 (0.61–3.18)        | 0.534             | 1.54 (0.68–3.49)          | 0.297             | 1.25 (0.56–2.78)        | 0.681             | 1.78 (0.80–3.97)        | 0.197             | 1.27 (0.57–2.81)        | 0.684             | 0.68 (0.31–1.53)        | 0.416             |
| ACS                              | 2.00 (0.74–5.40)        | 0.231             | 2.13 (0.84–5.38)          | 0.151             | 1.20 (0.48–3.00)        | 0.815             | 1.72 (0.69–4.31)        | 0.327             | 2.21 (0.87–5.61)        | 0.111             | 2.07 (0.78–5.45)        | 0.172             |
| Acute kidney failure             | 6.84 (0.84–55.93)       | 0.069             | <b>10.50 (1.28–85.88)</b> | <b>0.009</b>      | 1.66 (0.44–6.23)        | 0.510             | 3.71 (0.92–14.96)       | 0.075             | 4.10 (0.84–19.87)       | 0.090             | 6.85 (0.85–55.1)        | 0.044             |
| <b>Outcome after SAH</b>         |                         |                   |                           |                   |                         |                   |                         |                   |                         |                   |                         |                   |
| Cerebral infarction(s)           | <b>1.36 (1.01–1.83)</b> | <b>0.050</b>      | <b>1.71 (1.26–2.32)</b>   | <b>0.001</b>      | <b>1.36 (1.01–1.83)</b> | <b>0.043</b>      | <b>1.81 (1.32–2.47)</b> | <b>&lt;0.0001</b> | <b>1.36 (1.02–1.82)</b> | <b>0.045</b>      | <b>1.54 (1.15–2.07)</b> | <b>0.004</b>      |
| In-hospital mortality *          | <b>1.69 (1.17–2.44)</b> | <b>0.006</b>      | <b>1.95 (1.35–2.80)</b>   | <b>&lt;0.0001</b> | <b>1.64 (1.15–2.34)</b> | <b>0.008</b>      | <b>1.92 (1.33–2.75)</b> | <b>0.001</b>      | <b>1.64 (1.15–2.34)</b> | <b>0.007</b>      | <b>1.69 (1.17–2.46)</b> | <b>0.006</b>      |
| Unfavorable outcome ^            | <b>1.96 (1.43–2.68)</b> | <b>&lt;0.0001</b> | <b>2.56 (1.86–3.54)</b>   | <b>&lt;0.0001</b> | <b>1.84 (1.35–2.52)</b> | <b>&lt;0.0001</b> | <b>2.61 (1.88–3.61)</b> | <b>&lt;0.0001</b> | <b>2.07 (1.52–2.83)</b> | <b>&lt;0.0001</b> | <b>1.89 (1.38–2.59)</b> | <b>&lt;0.0001</b> |

**Abbreviations:** OR= odds ratio, SD= standard deviation, CI= confidence interval, AUC= area under the curve, ROC= receiver operating characteristics, SEBES= subarachnoid early brain edema score, DC= decompressive craniectomy, ICP= intracranial pressure, IVH= intraventricular hemorrhage, CRP= C-reactive protein, DIND= delayed ischemic neurological deficit, TCD= transcranial Doppler sonography, VS= vasospasms, ACS= acute coronary syndrome, DCI= delayed cerebral infarcts, ^ mRS >3 at 6 months. \* at admission, # within 3 days after ictus, angiographically confirmed. Significant values are in **bold**.

**Table S4.** Univariate analysis of adverse events. The ventricular indices are dichotomized according to the AUC in the ROC analyses. In all ventricular indices, higher values correspond with longer fever and higher inflammatory parameters in serum and CSF.

| Parameter                              | Univariate analysis       |                           |                   |
|----------------------------------------|---------------------------|---------------------------|-------------------|
|                                        | Absent (Mean ±SD)         | Present (Mean ±SD)        | p-value           |
| <i>Bifrontal ratio ≥ 0.337</i>         |                           |                           |                   |
| Age, years                             | 50.99 (±12.70)            | 58.77 (±14.09)            | <b>&lt;0.0001</b> |
| ICP therapy, days                      | 1.81 (±2.29)              | 1.71 (±2.65)              | 0.145             |
| Fever, days                            | <b>4.61 (±4.10)</b>       | <b>5.42 (±4.08)</b>       | <b>0.007</b>      |
| CRP at admission (mg/dl)               | <b>0.9 (±1.84)</b>        | <b>1.38 (±2.44)</b>       | <b>0.001</b>      |
| Mean 14-days CRP (mg/dl)               | 5.82 (±3.93)              | 6.27 (±4.20)              | 0.193             |
| WBC at admission (×10 <sup>9</sup> /L) | 13.42 (±4.94)             | 13.40 (±4.67)             | 0.772             |
| Mean 14-days WBC (×10 <sup>9</sup> /L) | 12.16 (±3.81)             | 12.38 (±3.46)             | 0.262             |
| CSF IL-6 at admission (pg/ml)          | 3620.47 (±6212.38)        | 4487.92 (±6958.39)        | 0.157             |
| Mean 14-days CSF IL-6 (pg/ml)          | <b>4789.11 (±6240.04)</b> | <b>5481.71 (±5151.54)</b> | <b>0.009</b>      |
| Mechanical ventilation, days           | 6.81 (±6.12)              | 7.26 (±6.07)              | 0.209             |
| Vasospasm on TCD, days                 | <b>2.76 (±3.47)</b>       | <b>1.94 (±2.91)</b>       | <b>0.003</b>      |
| <i>Bicaudate ratio ≥ 0.175</i>         |                           |                           |                   |
| Age, years                             | 51.13 (±12.71)            | 60.64 (±13.81)            | <b>&lt;0.0001</b> |
| ICP therapy, days                      | 1.87 (±2.50)              | 1.61 (±2.44)              | 0.134             |
| Fever, days                            | <b>4.62 (±4.06)</b>       | <b>5.68 (±4.10)</b>       | <b>0.001</b>      |
| CRP at admission (mg/dl)               | <b>0.97 (±1.96)</b>       | <b>1.39 (±2.44)</b>       | <b>&lt;0.0001</b> |
| Mean 14-days CRP (mg/dl)               | <b>5.74 (±3.87)</b>       | <b>6.59 (±4.36)</b>       | <b>0.022</b>      |
| WBC at admission (×10 <sup>9</sup> /L) | 13.44 (±4.52)             | 13.37 (±5.19)             | 0.409             |
| Mean 14-days WBC (×10 <sup>9</sup> /L) | 12.11 (±3.45)             | 12.57 (±3.80)             | 0.146             |
| CSF IL-6 at admission (pg/ml)          | 3944.76 (±7247.45)        | 4386.61 (±5940.23)        | 0.110             |
| Mean 14-days CSF IL-6 (pg/ml)          | <b>4613.92 (±5775.74)</b> | <b>5861.78 (±5439.29)</b> | <b>&lt;0.0001</b> |
| Mechanical ventilation, days           | <b>6.63 (±6.10)</b>       | <b>7.71 (±6.06)</b>       | <b>0.009</b>      |
| Vasospasm on TCD, days                 | <b>2.70 (±3.40)</b>       | <b>1.79 (±2.82)</b>       | <b>0.001</b>      |
| <i>Evans' index ≥ 0.281</i>            |                           |                           |                   |

|                                        |                           |                           |              |
|----------------------------------------|---------------------------|---------------------------|--------------|
| Age, years                             | 52.35 (±13.07)            | 57.96 (±14.45)            | <0.0001      |
| ICP therapy days                       | 1.95 (±2.49)              | 1.74 (±2.63)              | 0.093        |
| Fever days                             | <b>4.74 (±4.07)</b>       | <b>5.57 (±4.12)</b>       | <b>0.008</b> |
| CRP at admission (mg/dl)               | <b>1.00 (±2.02)</b>       | <b>1.31 (±2.33)</b>       | <b>0.002</b> |
| Mean 14-days CRP (mg/dl)               | 5.80 (±3.87)              | 6.36 (±4.25)              | 0.120        |
| WBC at admission (x10 <sup>9</sup> /L) | 13.42 (±4.87)             | 13.38 (±4.69)             | 0.881        |
| Mean 14-days WBC (x10 <sup>9</sup> /L) | 12.28 (±3.79)             | 12.30 (±3.41)             | 0.737        |
| CSF IL-6 at admission (pg/ml)          | 3373.09 (±5745.11)        | 4856.04 (±7346.77)        | 0.134        |
| Mean 14-days CSF IL-6 (pg/ml)          | <b>4577.24 (±5900.42)</b> | <b>5730.27 (±5279.91)</b> | <b>0.001</b> |
| Mechanical ventilation, days           | 6.96 (±6.11)              | 7.35 (±6.05)              | 0.285        |
| Vasospasm on TCD, days                 | 2.60 (±3.38)              | 2.14 (±3.08)              | 0.082        |
| Ventricular ratio ≥ 0.559              |                           |                           |              |
| Age, years                             | 51.64 (±13.16)            | 60.56 (±13.65)            | <0.0001      |
| ICP therapy days                       | 1.93 (±2.53)              | 1.67 (±2.43)              | 0.189        |
| Fever days                             | <b>4.80 (±4.07)</b>       | <b>5.61 (±4.12)</b>       | <b>0.013</b> |
| CRP at admission (mg/dl)               | <b>0.98 (±2.06)</b>       | <b>1.43 (±2.32)</b>       | <0.0001      |
| Mean 14-days CRP (mg/dl)               | <b>5.76 (±4.04)</b>       | <b>6.58 (±4.01)</b>       | <b>0.007</b> |
| WBC at admission (x10 <sup>9</sup> /L) | 13.45 (±4.53)             | 13.32 (±5.25)             | 0.367        |
| Mean 14-days WBC (x10 <sup>9</sup> /L) | 12.18 (±3.52)             | 12.50 (±3.83)             | 0.342        |
| CSF IL-6 at admission (pg/ml)          | <b>4016.12 (±7220.72)</b> | <b>4218.09 (±5556.59)</b> | <b>0.020</b> |
| Mean 14-days CSF IL-6 (pg/ml)          | <b>4555.10 (±5592.24)</b> | <b>6036.05 (±5585.13)</b> | <0.0001      |
| Mechanical ventilation, days           | 6.91 (±6.13)              | 7.49 (±5.98)              | 0.129        |
| Vasospasm on TCD, days                 | <b>2.59 (±3.38)</b>       | <b>1.99 (±2.97)</b>       | <b>0.021</b> |
| Huckmans index ≥ 5.480                 |                           |                           |              |
| Age, years                             | 50.59 (±12.74)            | 59.44 (±13.73)            | <0.0001      |
| ICP therapy days                       | <b>2.07 (±2.53)</b>       | <b>1.62 (±2.53)</b>       | <b>0.002</b> |
| Fever days                             | <b>4.71 (±4.13)</b>       | <b>5.57 (±4.04)</b>       | <b>0.003</b> |
| CRP at admission (mg/dl)               | <b>0.89 (±1.83)</b>       | <b>1.41 (±2.45)</b>       | <0.0001      |
| Mean 14-days CRP (mg/dl)               | 5.82 (±3.98)              | 6.36 (±4.12)              | 0.066        |
| WBC at admission (x10 <sup>9</sup> /L) | 13.40 (±4.69)             | 13.44 (±4.89)             | 0.971        |
| Mean 14-days WBC (x10 <sup>9</sup> /L) | 12.34 (±3.79)             | 12.26 (±3.44)             | 0.964        |
| CSF IL-6 at admission (pg/ml)          | 4000.47 (±7411.59)        | 4274.74 (±5841.40)        | 0.186        |
| Mean 14-days CSF IL-6 (pg/ml)          | <b>4614.28 (±5915.41)</b> | <b>5620.68 (±5293.95)</b> | <b>0.001</b> |
| Mechanical ventilation, days           | 6.86 (±6.08)              | 7.49 (±6.07)              | 0.098        |
| Vasospasm on TCD, days                 | <b>2.82 (±3.48)</b>       | <b>1.91 (±2.92)</b>       | <b>0.001</b> |
| 3rd ventricle ratio ≥ 0.053            |                           |                           |              |
| Age, years                             | 50.02 (±12.22)            | 59.24 (±14.09)            | <0.0001      |
| ICP therapy days                       | <b>2.15 (±2.67)</b>       | <b>1.50 (±2.28)</b>       | <b>0.001</b> |
| Fever days                             | <b>4.65 (±4.08)</b>       | <b>5.54 (±4.10)</b>       | <b>0.004</b> |
| CRP at admission (mg/dl)               | <b>0.98 (±2.06)</b>       | <b>1.32 (±2.30)</b>       | <0.0001      |
| Mean 14-days CRP (mg/dl)               | <b>5.62 (±3.87)</b>       | <b>6.37 (±4.16)</b>       | <b>0.020</b> |
| WBC at admission (x10 <sup>9</sup> /L) | 13.40 (±4.70)             | 13.30 (±4.79)             | 0.914        |
| Mean 14-days WBC (x10 <sup>9</sup> /L) | 12.17 (±3.69)             | 12.32 (±3.47)             | 0.223        |
| CSF IL-6 at admission (pg/ml)          | 4574.69 (±8471.86)        | 4059.89 (±5564.72)        | 0.397        |
| Mean 14-days CSF IL-6 (pg/ml)          | <b>4270.01 (±4987.71)</b> | <b>5865.82 (±6117.89)</b> | <0.0001      |
| Mechanical ventilation, days           | 6.85 (±5.97)              | 7.42 (±6.20)              | 0.204        |
| Vasospasm on TCD, days                 | <b>2.78 (±3.47)</b>       | <b>2.04 (±3.03)</b>       | <b>0.009</b> |

**Abbreviations:** AUC= area under the curve, ROC= receiver operating characteristics, ICP= intracranial pressure, CRP= C-reactive protein, CSF= cerebrospinal fluid, IL-6= interleukin-6, WBC= white blood cells count, TCD= transcranial Doppler sonography. Significant findings are in **bold**.

**Table S5.** Multivariate analyses of the predictors of the secondary study endpoints using binary logistic regression with obligatory inclusion of major confounders (patients' age and WFNS, Fisher and SEBES grades at admission) enhanced by the ventricle indices included in the stepwise backward regression model (only the last steps are shown here). For the multivariate analysis of the predictors of mean 14-days CSF IL-6, bacterial meningitis was included as an additional confounder to the prediction model. The continuous endpoints were dichotomized according to the common reference values or the mean/median values within the analyzed cohort. Only the last step of each multivariate analysis is shown.

|                                                                               |              |             |              |                   |
|-------------------------------------------------------------------------------|--------------|-------------|--------------|-------------------|
| <b>Decompressive craniectomy (DC)</b>                                         |              |             |              |                   |
| Age >55 years                                                                 | 0.77         | 0.51        | 1.16         | 0.211             |
| <b>WFNS grade 4–5</b>                                                         | <b>2.90</b>  | <b>1.92</b> | <b>4.36</b>  | <b>&lt;0.0001</b> |
| <b>SEBES 3–4</b>                                                              | <b>2.17</b>  | <b>1.44</b> | <b>3.25</b>  | <b>&lt;0.0001</b> |
| <b>Fisher grade 3–4</b>                                                       | <b>6.25</b>  | <b>2.14</b> | <b>18.21</b> | <b>0.001</b>      |
| Bifrontal ratio >0.337                                                        | 0.69         | 0.45        | 1.06         | 0.092             |
| <b>Ventricular ratio &gt;0.559</b>                                            | <b>0.43</b>  | <b>0.26</b> | <b>0.70</b>  | <b>0.001</b>      |
| Third ventricular ratio >0.053                                                | 0.66         | 0.42        | 1.04         | 0.076             |
| <b>Any ICP increase requiring conservative and/or surgical (DC) treatment</b> |              |             |              |                   |
| Age >55 years                                                                 | 0.64         | 0.45        | 0.93         | 0.018             |
| <b>WFNS grade 4–5</b>                                                         | <b>3.16</b>  | <b>2.21</b> | <b>4.51</b>  | <b>&lt;0.0001</b> |
| <b>SEBES 3–4</b>                                                              | <b>2.22</b>  | <b>1.57</b> | <b>3.15</b>  | <b>&lt;0.0001</b> |
| <b>Fisher grade 3–4</b>                                                       | <b>2.74</b>  | <b>1.44</b> | <b>5.22</b>  | <b>0.002</b>      |
| <b>Third ventricular ratio &gt;0.053</b>                                      | <b>0.65</b>  | <b>0.46</b> | <b>0.93</b>  | <b>0.017</b>      |
| <b>CRP at admission <math>\geq</math> 0.5 mg/dL</b>                           |              |             |              |                   |
| Age >55 years                                                                 | 0.98         | 0.68        | 1.40         | 0.910             |
| WFNS grade 4–5                                                                | 1.11         | 0.78        | 1.57         | 0.563             |
| SEBES 3–4                                                                     | 1.15         | 0.81        | 1.63         | 0.436             |
| Fisher grade 3–4                                                              | 1.20         | 0.69        | 2.08         | 0.514             |
| <b>Evans ratio &gt;0.2813</b>                                                 | <b>1.55</b>  | <b>1.11</b> | <b>2.18</b>  | <b>0.011</b>      |
| <b>Ventricular ratio &gt;0.559</b>                                            | <b>1.49</b>  | <b>1.04</b> | <b>2.13</b>  | <b>0.031</b>      |
| <b>Aneurysm rebleeding</b>                                                    |              |             |              |                   |
| Age >55 years                                                                 | 1.49         | 0.78        | 2.87         | 0.228             |
| <b>WFNS grade 4–5</b>                                                         | <b>2.07</b>  | <b>1.04</b> | <b>4.14</b>  | <b>0.040</b>      |
| SEBES 3–4                                                                     | 1.28         | 0.66        | 2.49         | 0.460             |
| Fisher grade 3–4                                                              | 1.46         | 0.32        | 6.61         | 0.625             |
| <b>TCD Vasospasm</b>                                                          |              |             |              |                   |
| <b>Age &gt;55 years</b>                                                       | <b>0.52</b>  | <b>0.36</b> | <b>0.75</b>  | <b>&lt;0.0001</b> |
| WFNS grade 4–5                                                                | 1.21         | 0.84        | 1.76         | 0.306             |
| <b>SEBES 3–4</b>                                                              | <b>2.24</b>  | <b>1.56</b> | <b>3.21</b>  | <b>&lt;0.0001</b> |
| Fisher grade 3–4                                                              | 1.56         | 0.88        | 2.79         | 0.131             |
| <b>Fever for &gt;5 days</b>                                                   |              |             |              |                   |
| Age >55 years                                                                 | 0.71         | 0.49        | 1.01         | 0.058             |
| <b>WFNS grade 4–5</b>                                                         | <b>1.83</b>  | <b>1.29</b> | <b>2.59</b>  | <b>0.001</b>      |
| SEBES 3–4                                                                     | 1.12         | 0.79        | 1.60         | 0.519             |
| Fisher grade 3–4                                                              | <b>3.72</b>  | <b>1.93</b> | <b>7.19</b>  | <b>&lt;0.0001</b> |
| Evans' index >0.281                                                           | 1.55         | 1.10        | 2.18         | 0.012             |
| <b>Systemic infections</b>                                                    |              |             |              |                   |
| Age >55 years                                                                 | 1.14         | 0.80        | 1.62         | 0.473             |
| <b>WFNS grade 4–5</b>                                                         | <b>2.00</b>  | <b>1.41</b> | <b>2.83</b>  | <b>&lt;0.0001</b> |
| SEBES 3–4                                                                     | 0.83         | 0.58        | 1.18         | 0.298             |
| <b>Fisher grade 3–4</b>                                                       | <b>2.87</b>  | <b>1.45</b> | <b>5.65</b>  | <b>0.002</b>      |
| <b>Acute renal failure</b>                                                    |              |             |              |                   |
| Age >55 years                                                                 | 0.73         | 0.15        | 3.56         | 0.696             |
| WFNS grade 4–5                                                                | 2.52         | 0.49        | 13.04        | 0.270             |
| SEBES 3–4                                                                     | 0.37         | 0.06        | 2.10         | 0.260             |
| Fisher grade 3–4                                                              | 9,908,780.60 | -           |              | 0.997             |

|                                                    |                         |      |       |                   |
|----------------------------------------------------|-------------------------|------|-------|-------------------|
| Bicaudate ratio >0.175                             | 7.35                    | 0.83 | 64.81 | 0.073             |
| <b>High mean 14–days CSF IL–6 (&gt;3300 mg/dL)</b> |                         |      |       |                   |
| Age >55 years                                      | <b>2.10 (1.26–3.52)</b> |      |       | <b>0.005</b>      |
| WFNS grade 4–5                                     | 1.62 (0.99–2.65)        |      |       | 0.057             |
| SEBES 3–4                                          | 1.05 (0.87–1.27)        |      |       | 0.618             |
| Fisher grade 3–4                                   | 1.14 (0.37–3.46)        |      |       | 0.823             |
| Bacterial meningitis                               | <b>2.80 (1.67–4.69)</b> |      |       | <b>&lt;0.0001</b> |
| 3 <sup>rd</sup> ventricle ratio >0.053             | <b>1.69 (1.01–2.82)</b> |      |       | <b>0.047</b>      |

**Abbreviations:** aOR= adjusted odds ratio, CI= confidence interval, ROC= receiver operating characteristic, SEBES= subarachnoid hemorrhage early brain edema score, WFNS= world federation of neurosurgical societies, TCD= transcranial Doppler sonography, CSF= cerebrospinal fluid, IL-6= Interleukin-6, ICP= intracranial pressure. Significant findings are in **bold**.

**Disclaimer/Publisher’s Note:** The statements, opinions and data contained in all publications are solely those of the individual author(s) and contributor(s) and not of MDPI and/or the editor(s). MDPI and/or the editor(s) disclaim responsibility for any injury to people or property resulting from any ideas, methods, instructions or products referred to in the content.
